# Supplementary material for: The Sodium–Glucose Co-Transporter-2 (SGLT2) Inhibitors Reduce Platelet Activation and Thrombus Formation by Lowering NOX2-Related Oxidative Stress: A Pilot Study
Source: MDPI journal article supplement (doi:10.3390/antiox11101878), 2022-09-22
Supplement: s1 [file s1]

**Figure S1**

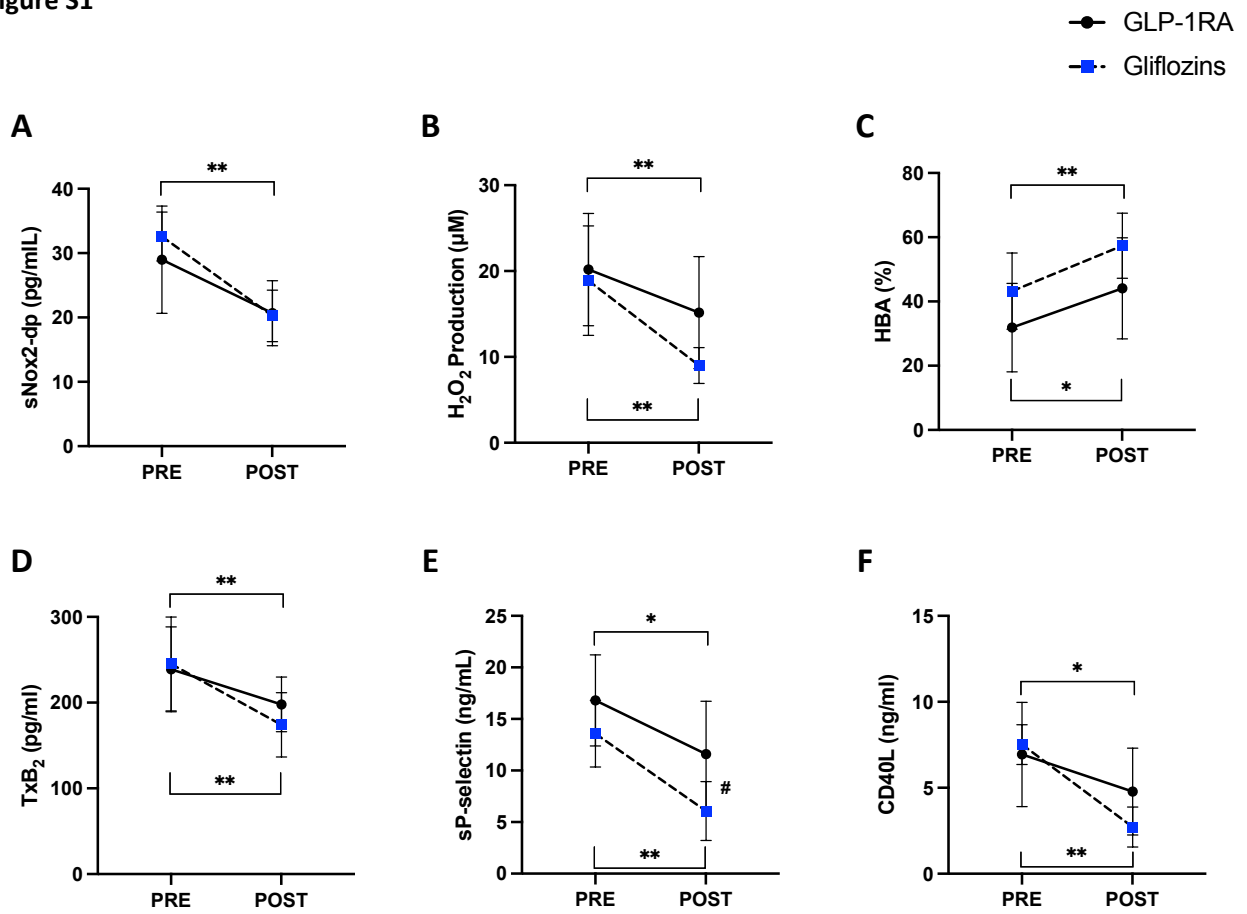

**Figure S1.** (a) Serum soluble NOX2-derived peptide (sNOX2-dp), (b) serum H<sub>2</sub>O<sub>2</sub>, and (c) blood HBA (d) thromboxane B<sub>2</sub> production, (e) soluble P-selectin levels and (f) soluble CD40 ligand before and 15 days after administration of GLP-1RA (n=8) or Gliflozins (n=8) in patients not taking acetylsalicylic acid (ASA) and all on statin therapy. Data are expressed as mean±SD. Intra- group significance: \*p<0.01; \*\*p<0.001; inter-group significance: # p<0.05.
